# Supplementary material for: Deciphering the Mechanism of Tolerance to Apple Replant Disease Using a Genetic Mapping Approach in a Malling 9 × M. × robusta 5 Population Identifies SNP Markers Linked to Candidate Genes
Source: MDPI journal article supplement (doi:10.3390/ijms24076307), 2023-03-27

Supplemental Figure S1: High-density map for the ARD-susceptible rootstock M9 based on SNP and SSR markers. Linkage groups 1–17 represents the 17 chromosomes of *Malus domestica* GDDH13 v.1.1 reference genome.

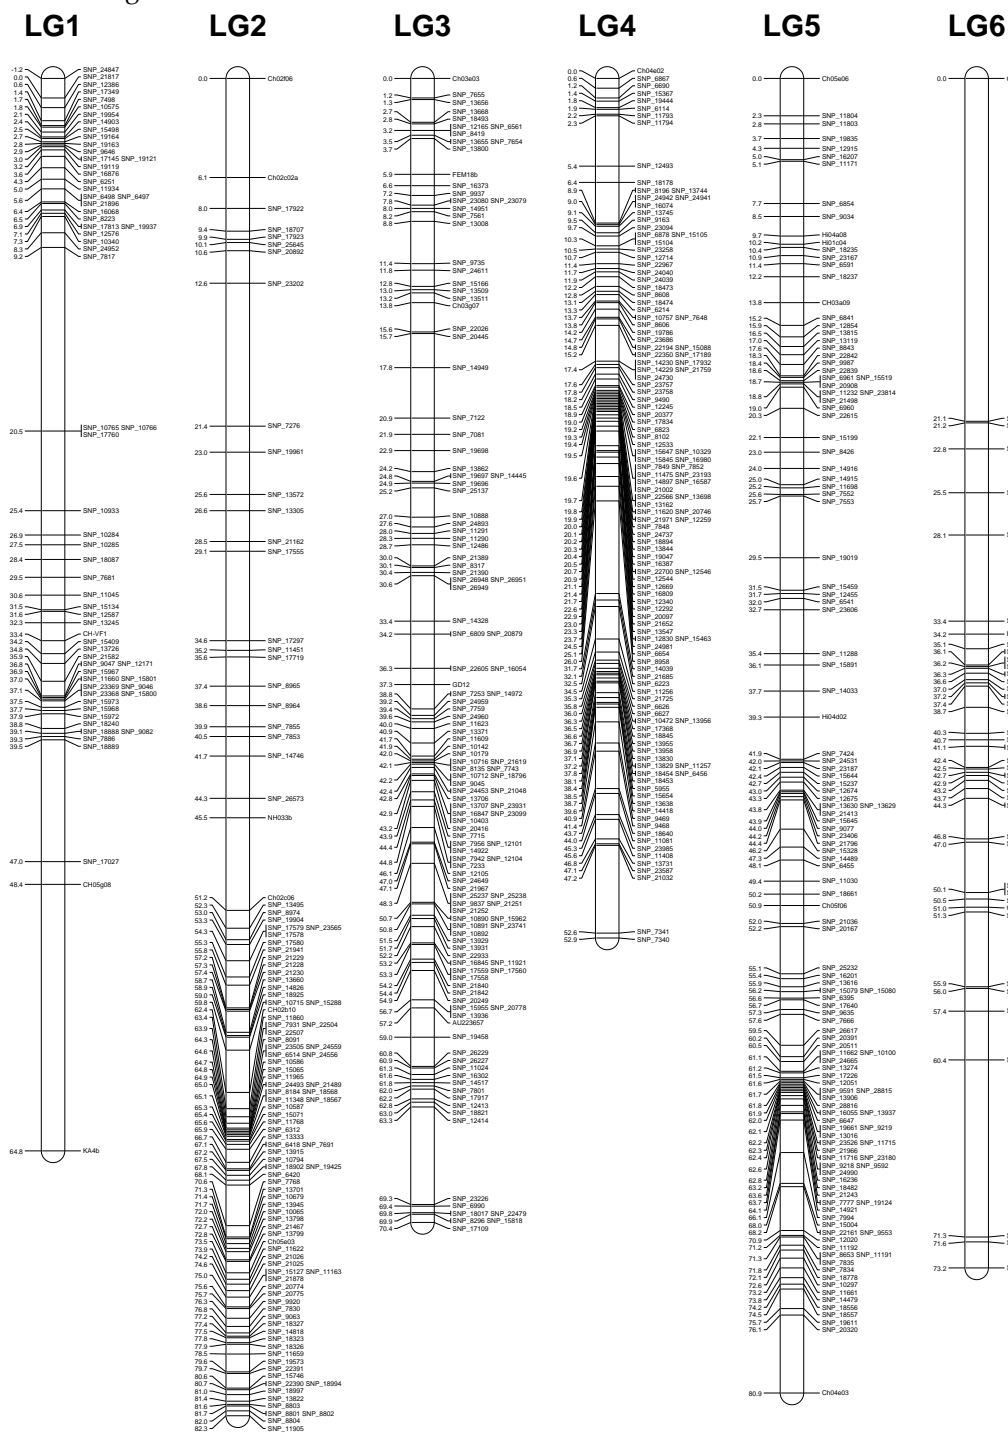

## LG7

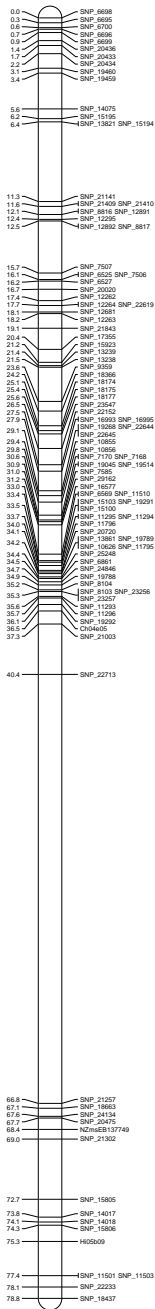

## LG8

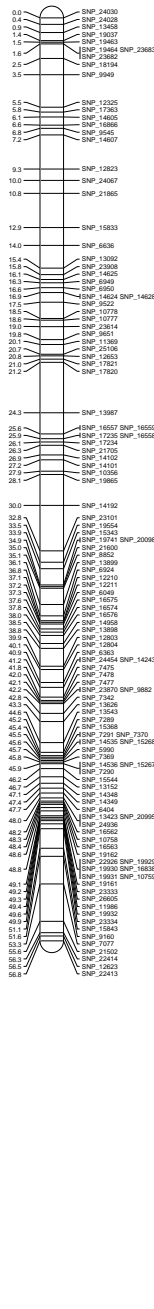

## LG9

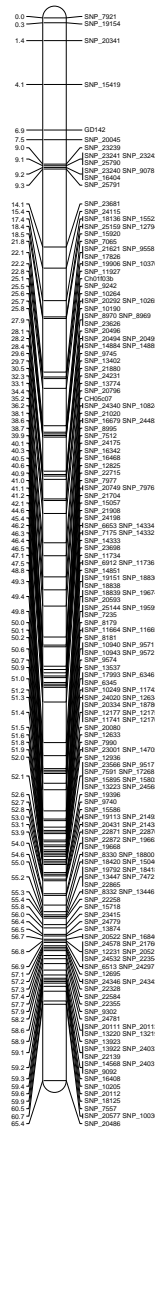

## LG10

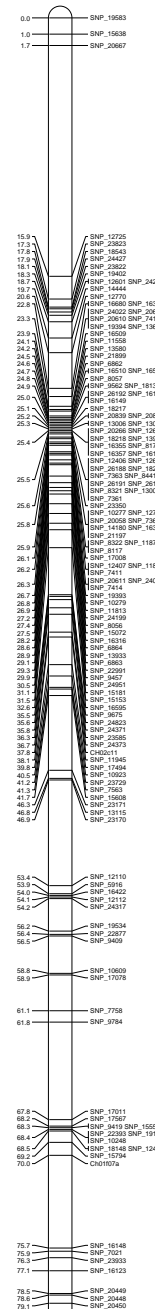

## LG11

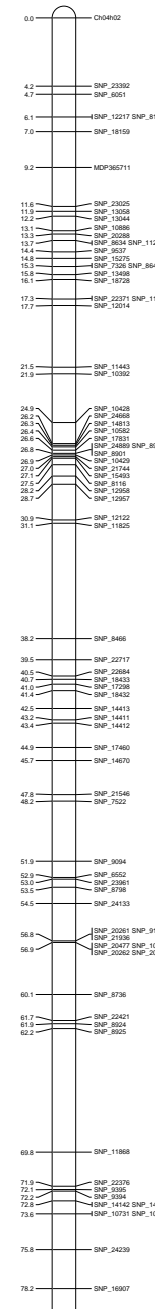

## LG12

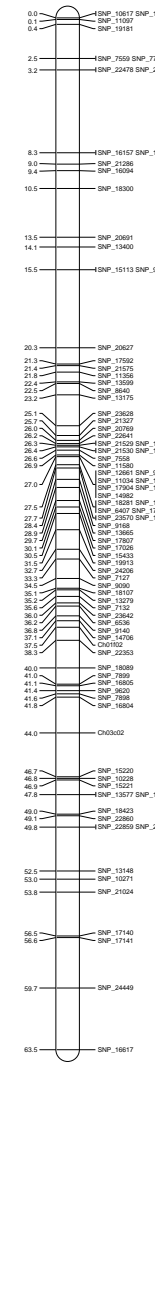

Supplement: s1 [file s1]
