# Supplementary material for: Deciphering the Mechanism of Tolerance to Apple Replant Disease Using a Genetic Mapping Approach in a Malling 9 × M. × robusta 5 Population Identifies SNP Markers Linked to Candidate Genes
Source: MDPI journal article supplement (doi:10.3390/ijms24076307), 2023-03-27

Genetic map showing SNPs and recombination rates across 22 chromosomes (LG1 to LG6). The map displays the positions of SNPs (Single Nucleotide Polymorphisms) and recombination rates (indicated by vertical lines) along the chromosomes. The chromosomes are labeled LG1 through LG6, and the map includes a scale from 0.0 to 1.0 for each chromosome. The map is a detailed representation of the human genome's genetic variation and recombination patterns.

## LG7

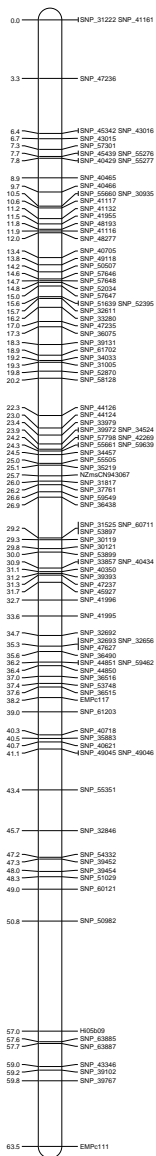

## LG8

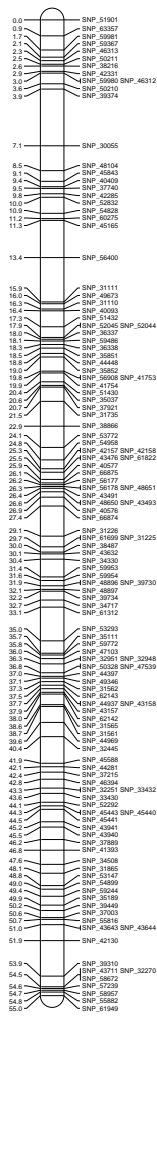

## LG9

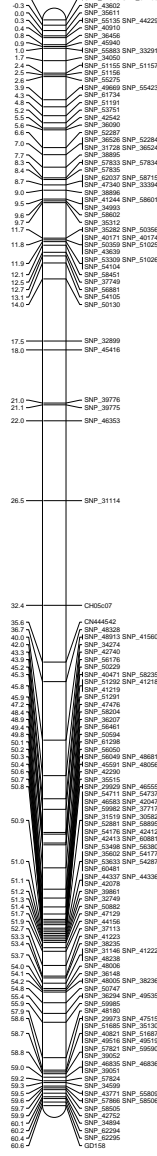

## LG10

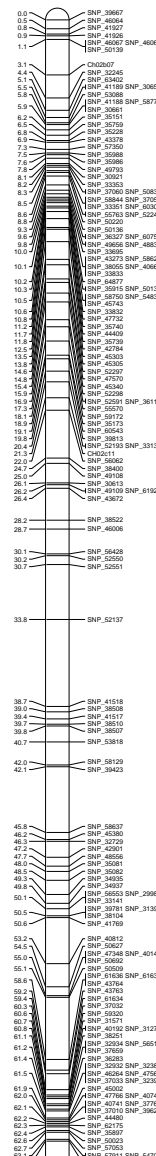

## LG11

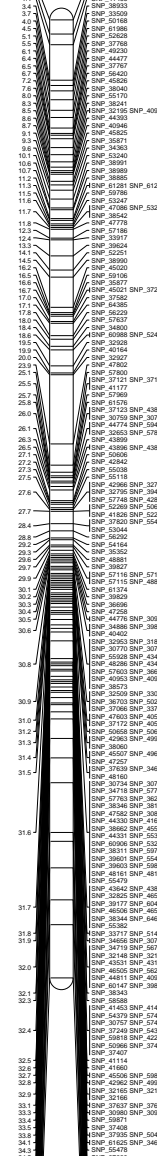

## LG12

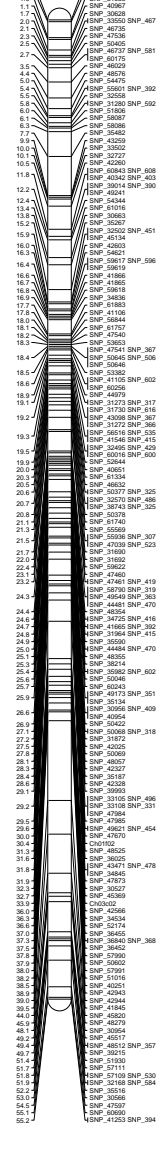

# LG13

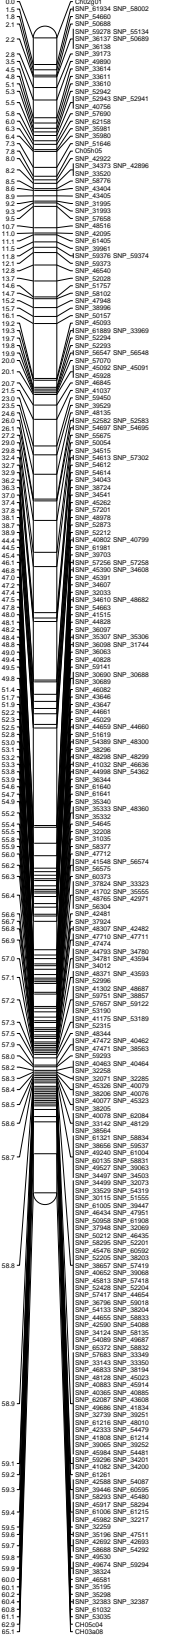

# LG14

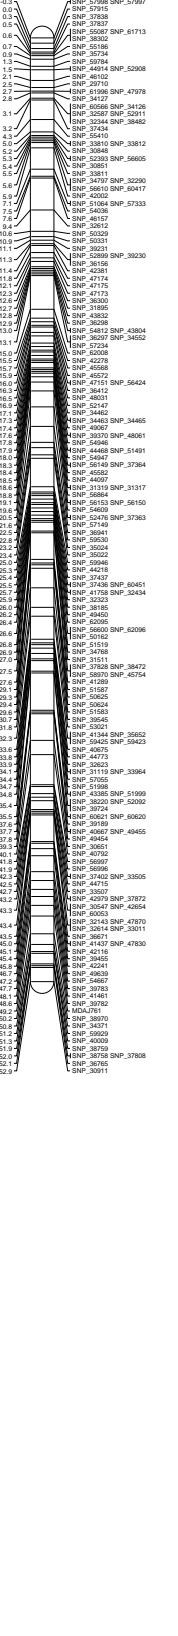

# LG15

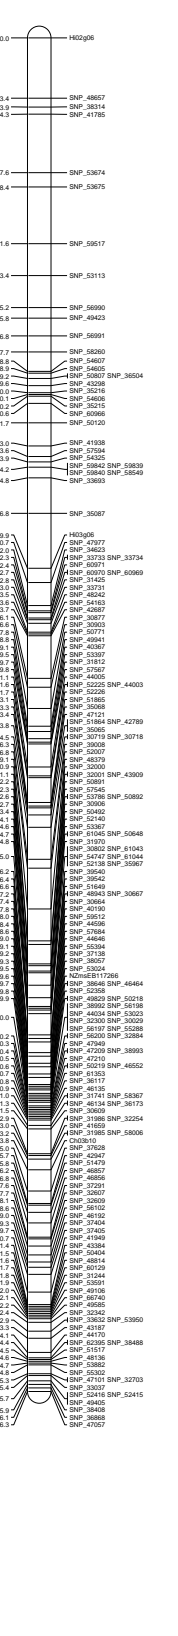

# LG16

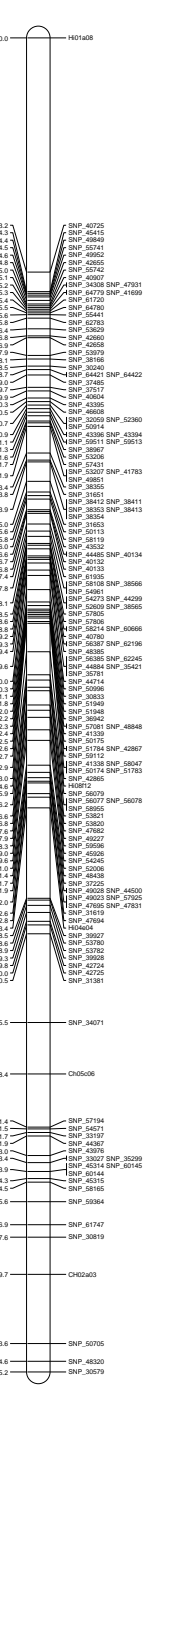

# LG17

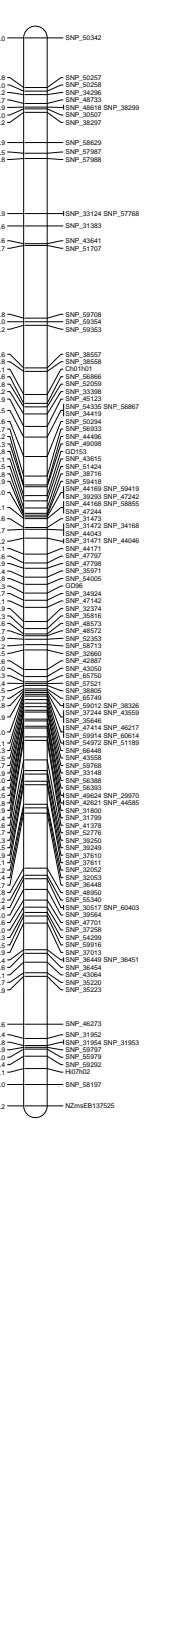

Supplement: s1 [file s1]
